# Supplementary material for: Disease dynamics and potential mitigation among restored and wild staghorn coral, Acropora cervicornis
Source: PeerJ. 2014 Aug 28;2:e541. doi: 10.7717/peerj.541 (PMC4157300; doi:10.7717/peerj.541)
Supplement: Supplemental Information 2 [file peerj-02-541-s007.xlsx]

## Sheet: Disease Prevalence
		2011											2012
	Survey#	1	2	3	4	5	6	7	8	9			1	2	3	4	5	6	7
Restored	Molasses	3	2.30769	3.125	14.6341	16.092	23.3645	25.5814	27.0833	6.66667			2.38	3.88	5.5	1.9	3.2	18.3	27.1
	Aquarius	NA	4.16667	10.2564	22.5	22.8571	16	16.6667	25.5814	NA
	Conch Shallow	2.63158	0	0	2.5	2.5641	13.3333	2.5641	0	8.33333			7.14	8.82	17.8	5.3	24.3	60	22.7
	French	3.77358	9.25926	2.12766	4.61	0	0	16.9	30	14.7059			0	4	10.9	19.6	27.1	43.6	2.7
	KL Dry Rocks	0	3.22581	0	0	0	0	2.7027	0	0			2.94	7.5	25	10.2	6.7	69.2	17.4
	Pickles	NA	0	15.625	9.41176	2.73973	1.36986	27.5362	41.2698	18.75			0	2.65	9.1	3.8	0	28.6	28.1
Wild	TavPatch A	3.0303	0	0	0	2	0	2.85714	5.55556	0			0	8.62	4.5	0	1.9	25	26.9
	TavPatch B	0	2.5	7.14286	13.0435	7.14286	0	5.88235	2.85714	0			3.57	10.31	0	10	7	26.1	31.6
	Little Conch	0	NA	13.6364	4.54545	0	4.34783	4	0	8.82353			20	38.8	47.8	32.4	35.7	56.9	27.3

## Sheet: 2012 Incidence of tagged coloni
							Tagged colonies observed with tissue-loss disease at each survey in 2012
	2012 All TAGGED COLONIES AT EACH SITE							equals carryover infection from previous survey (i.e., NOT new incidence)
	Site ID	Ind ID					S01	S02	S03	S04	S05	S06
	ConchShal	O168						W157	P069	P086	O147	K156
	Conchshal	O169						W165	P082	P095	K156	K158
	ConchShal	O170						O171	P085	P097	K158	K160
	ConchShal	O171						P127	P094	P113	K161	K161
	ConchShal	O172						O147	P096	K046	K162	K162
	ConchShal	O173						P066	P098	K171	K163	K164
	ConchShal	O174					O175	P087	O148	K172	K165	K165
	ConchShal	O175					O176	P093	O149		K171	K166
	ConchShal	O176					O188		O150		K172	K168
	ConchShal	O177							O151		W159	K169
	ConchShal	O178						O176	O153	P082	P115	K171
	ConchShal	O179						P080	O158	P085	O174	K172
	ConchShal	O180						P083	O159	P087	O176	W178
	ConchShal	O181						P086	W190	P093	O188	W179
	ConchShal	O182							W200	P094	O190	W182
	ConchShal	O183							W159	P096	P080	W183
	ConchShal	O184							W163	W163	P082	W190
	ConchShal	O185					P080		K157	K161	P084	W194
	ConchShal	O186					P083		K158		P087	W200
	ConchShal	O188					P086		K159		P089	O168
	ConchShal	O190					P090		K161		P092	O169
	ConchShal	O191									P096	O172
	FR	K046									P097	O173
	FR	K156							P080		P098	O179
	FR	K157					CS=3	ML=2	P087			O184
	FR	K158					LC=3		P093			P111
	FR	K159							O176			P125
	FR	K160							O147			P137
	FR	K161							W165			P059
	FR	K162										P067
	FR	K163										O140
	FR	K164										O144
	FR	K165										O145
	FR	K166										O146
	FR	K167										O148
	FR	K168										O152
	FR	K169										O153
	FR	K170										O154
	FR	K171										O155
	FR	K172										O156
	FR	K173										O157
	FR	K174										O158
	KLDR	O140										O159
	KLDR	O141										O186
	KLDR	O142										O188
	KLDR	O143										P081
	KLDR	O144										P082
	KLDR	O145										P083
	KLDR	O146										P084
	KLDR	O147										P086
	KLDR	O148										P088
	KLDR	O149										P089
	KLDR	O150										P090
	KLDR	O151										P091
	KLDR	O152										P092
	KLDR	O153										P096
	KLDR	O154										P097
	KLDR	O155										P098
	KLDR	O156										P099
	KLDR	O157
	KLDR	O158
	KLDR	O159
	LitConch	P080
	LitConch	P081
	LitConch	P082
	LitConch	P083
	LitConch	P084
	LitConch	P085
	LitConch	P086
	LitConch	P087
	LitConch	P088
	LitConch	P089
	LitConch	P090
	LitConch	P091
	LitConch	P092
	LitConch	P093
	LitConch	P094
	LitConch	P095
	LitConch	P096
	LitConch	P097
	LitConch	P098
	LitConch	P099
	ML	W156
	ML	W157
	ML	W158
	ML	W159
	ML	W161
	ML	W162
	ML	W163
	ML	W164
	ML	W165
	ML	W166
	ML	W167
	ML	W168
	ML	W170
	ML	W171
	ML	W172
	ML	W173
	ML	W174
	ML	W175
	ML	W176
	ML	W177
	PI	W178
	PI	W179
	PI	W181
	PI	W182
	PI	W183
	PI	W184
	PI	W185
	PI	W186
	PI	W188
	PI	W189
	PI	W190
	PI	W191
	PI	W192
	PI	W193
	PI	W194
	PI	W196
	PI	W197
	PI	W198
	PI	W199
	PI	W200
	Tav-A	P059
	Tav-A	P060
	Tav-A	P061
	Tav-A	P062
	Tav-A	P063
	Tav-A	P064
	Tav-A	P065
	Tav-A	P066
	Tav-A	P067
	Tav-A	P068
	Tav-A	P069
	Tav-A	P070
	Tav-A	P071
	Tav-A	P072
	Tav-A	P073
	Tav-A	P074
	Tav-A	P075
	Tav-A	P076
	Tav-A	P077
	Tav-A	P078
	Tav-A	P079
	Tav-B	P109
	Tav-B	P111
	Tav-B	P113
	Tav-B	P115
	Tav-B	P116
	Tav-B	P118
	Tav-B	P119
	Tav-B	P120
	Tav-B	P121
	Tav-B	P122
	Tav-B	P123
	Tav-B	P124
	Tav-B	P125
	Tav-B	P127
	Tav-B	P128
	Tav-B	P129
	Tav-B	P131
	Tav-B	P132
	Tav-B	P134
	Tav-B	P135
	Tav-B	P137

## Sheet: Partial Mortality of Tagged col
		2012 Disease Cases among tagged colonies at Restored sites
		% dead visually estimated at each survey												2012 Disease Cases among tagged colonies at Wild sites
														% dead visually estimated at each survey
										Removed S6 only cases												Removed S6 only cases
		Colony/ tag#	%deadS1	%deadS2	%deadS3	%deadS4	%deadS5	%deadS6	GROSS Tissue LOSS	Gros LOSS - storm				Colony/ tag#	%deadS1	%deadS2	%deadS3	%deadS4	%deadS5	%deadS6	GROS Tissue LOSS	Gros LOSS - storm
		K046	0	0	0	0.15	0	0	0	0				P059			0.1	0.1	0	0.05
		K156	0	0.05	0.01	0.05	0.5	0.65	0.65	0.5				P066	0.4	0.15	0	0	0	0	-0.4	-0.4
		K157	0.1	0.35	0.3	0.1	0.25	0.8	0.7	0.15				P067	0.1	0.2	0.2	0.15	0.2	0.25	0.15
		K158	0.05	0.15	0.15	0.05	0.1	0.05	-7.45058e-10	0.05				P069	0.05	0	0.45	0.2	0.3			0.25
		K159	0.9	0.85	0.8	0.95	0.9	0.9	2.38419e-08	2.38419e-08				P080	0.8	0.75	0.7	0.65	0.5	0.95	0.15	-0.3
		K160	0.75	0.75	0.6	0.5	0.6	0.9	0.15					P081	0.55	0.6	0.5	0.4	0.5	0.9	0.35
		K161	0.45	0.4	0.5	0.4	0.7	0.9	0.45	0.25				P082	0.05	0.01	0.4	0.2	0.4	0.5	0.45	0.35
		K162	0	0	0	0	0.7	0.5	0.5	0.7				P083	0.33	0.5	0.5	0.55	0.35	0.8	0.47	0.02
		K163	0	0	0	0	0.45			0.45				P084	0.5	0.2	0.25	0.2	0.15	0.2	-0.3	-0.35
		K164	0	0	0	0	0	0.5	0.5					P085	0.05	0.01	0.3	0.9	0.95	0.99	0.94	0.9
		K165	0.4	0.5	0.3	0.4	0.25	0.6	0.2	-0.15				P086	0.3	0.45	0.5	0.7	0.7	0.95	0.65	0.4
		K166	0.5	0.5	0.35	0.4	0.35							P087	0.1	0.15	0.4	0.3	0.55	0.7	0.6	0.45
		K168	0	0	0	0	0	0.3	0.3					P088	0.45	0.05	0.2	0.35	0	0.6	0.15
		K169	0.15	0.1	0.05	0	0	1	0.85					P089	0.5	0.3	0.01	0.01	0.25	0.3	-0.2	-0.25
		K171	0.35	0.3	0.25	0.45	0.5	0.85	0.5	0.15				P090	0.15	0.1	0.05	0.05	0	0.35	0.2
		K172	0.05	0.05	0.05	0.1	0.25	0.15	0.1	0.2				P091	0.05	0	0.05	0.05	0	0.15	0.1
		O140	0	0	0	0.01	0	0.2	0.2					P092	0.05	0	0.01	0.1	0.1	0.65	0.6	0.05
		O144	0	0	0	0	0	0.8	0.8					P093	0.2	0.1	0.5	0.35	0.2	0.45	0.25	-2.98023e-09
		O145	0	0.01	0	0	0.05	0.7	0.7					P094	0.05	0.05	0.1	0.3	0.3			0.25
		O146	0.05	0.01	0	0	0	0.95	0.9					P095	0.05	0	0	0.6	0.5	0.5	0.45	0.45
		O147	0.05	0.1	0.1	0.05	0.6	1	0.95	0.55				P096	0.05	0.05	0.3	0.2	0.33	0.65	0.6	0.28
		O148	0.3	0.45	0.75	0.9	0.9	0.99	0.69	0.6				P097	0.05	0	0.05	0.75	0.6	0.9	0.85	0.55
		O149	0.3	0.2	0.9	0.98	0.9	1	0.7	0.6				P098	0.1	0.15	0.5	0.5	0.55	0.5	0.4	0.45
		O150	0.15	0.2	0.8	0.6	0.6	1	0.85	0.45				P099	0.05	0.05	0	0.05	0	0.15	0.1
		O151	0.3	0.75	0.65	0.55	0.5			0.2				P111	0.05	0.05	0.05	0.05	0.05	0.1	0.05
		O152	0	0	0	0.01	0	0.8	0.8					P113	0.05	0.1	0.1	0.8	0.8	0.65	0.6	0.75
		O153	0	0.01	0.1	0.15	0.05	0.3	0.3	0.05				P115	0.15	0.2	0.2	0.55	0.75			0.6
		O154	0.05	0.01	0	0	0	0.2	0.15					P116	0	0	0.05	0.2	1			1
		O155	0	0	0	0	0	0.2	0.2					P125	0.05	0.05	0.1	0.1	0.05	0.35	0.3
		O156	0	0	0	0	0	0.85	0.85					P127	0.9	0.8	0.75	0.8	0.9	0.8	-0.1	2.38419e-08
		O157	0	0	0	0	0	0.25	0.25					P137	0	0	0	0.05	0	0.1	0.1
		O158	0.05	0.15	0.5	0.55	0.5	0.7	0.65	0.45
		O159	0.05	0.05	0.25	0.35	0.5	0.85	0.8	0.45
		O168	0.05	0.5	0.2	0.15	0.1	0.75	0.7
		O169	0.15	0.2	0.2	0.15	0.1	0.85	0.7
		O171	0.4	0.4	0.25
		O172	0.1	0.05	0.01	0.01	0	0.6	0.5
		O173	0.1	0	0	0	0	0.95	0.85
		O174	0.5	0.5	0.45	0.4	0.5			0
		O175	0.85
		O176	0.8	0.45	0.65	0.65	0.75			-0.05
		O179	0	0	0	0.1	0	0.55	0.55
		O181	0	0	0	0.01	0	1	1	0
		O184	0.25	0.25	0.05	0.25	0.1	0.9	0.65
		O186	0.05	0	0	0	0	0.95	0.9
		O188	0.3	0.2	0.3	0.3	0.5	0.95	0.65	0.2
		O190			0.05	0.25	0.3	0.45	0.45	0.3
		W157	0.65	0.55	0.7	0.9	0.99			0.34
		W159	0.4	0.6	0.8	0.85	0.65	0.95	0.55	0.25
		W163	0.02	0.05	0.3	0.8	0.4	0.5	0.48	0.38
		W165	0.05	0.2	0.8	0.8	0.7	0.6	0.55	0.65
		W178	0.8	0.9	0.8	0.75	0.8	0.8	-1.19209e-08
		W179	0.9	0.75	0.8	0.7	0.45	0.6	-0.3
		W182	0	0	0	0	0.01	0.6	0.6
		W183	0	0.05	0	0.01	0.05	0.15	0.15
		W184	0	0	0	0	0.05	1	1	0.05
		W190	0.75	0.8	0.8	0.55	0.85	0.85	0.1	0.1
		W194	0	0	0	0	0	0.01	0.01	0
		W200	0.05	0.05	0.4	0.4	0.4	0.95	0.9	0.35

## Sheet: Mitigation Expt
2011 Mitigation Replicates						0=0% tissue loss, 1=more than 0% tissue loss								2012 Mitigation Replicates					0=0% tissue loss, 1=more than 0% tissue loss
		Site	Replicate designation	Treatment	Date Implemented	Tissue loss after 4 weeks?	Description							Site ID	Replicate designation	Treatment	Survey Started	Survey concluded	TLProg
		Aquarius	K26	control	2011-05-18	1	Successful control - rapid
		Aquarius	K28	control	2011-05-18	1	Successful control - rapid
		Aquarius	Y17	control	2011-06-22	0	Unsuccessful control							ConchShal	M044-ct	Control	1	2	1
		Aquarius	K31	control	2011-06-22	SNAILS								ConchShal	M044-ct2	Control	2	3	1
		Aquarius	B5	control	2011-06-22	SNAILS								ConchShal	M329-ct	Control	1	2	0
		Aquarius	O6	control	2011-06-22	1	Successful control - slow progression, second branch sampled							ConchShal	O171-ct	Control	2	3	0
		Aquarius	O6	control	2011-06-22	1	(2nd branch sampled)							FR	K157-ct	Control	2	3	0
		Aquarius	Y69	control	2011-06-22	1	Successful control - slow progression, small amount of tissue loss							FR	K159-ctB	Control	3	4	1
		Aquarius	Y66	control	2011-06-22	0	Unsuccessful control, algal overgrowth of skeleton beneath cable tie							FR	K161-ct	Control	2	3	0
		Aquarius	Y66	control	2011-06-22	1	Successful control - rapid progression followed by inactivity, algal overgrowth of skeleton							FR	K161-ctY	Control	3	4	0
		Aquarius	K33/34	control	2011-06-24	1	Successful control - rapid							FR	M229-ctO	Control	5	6	1
		French B	K37	control	2011-05-17	1	Successful control - slow progression, small amount of tissue loss							FR	M229-ctP	Control	5	6
		French B	K38	control	2011-06-03	0	Unsuccessful hermodice tip cable tie							KLDR	O147-ct	Control	2	3	0
		French B	K87	control	2011-07-01	1	Successful control - delayed progression?							KLDR	O148-ctP	Control	3	4	0
		Molasses	K88	control	2011-07-14	0	Unsuccessful control							KLDR	O158-ctB	Control	3	4	1
		Molasses	K98	control	2011-08-03	1	Successful control - rapid							LitConch	M268-ct	Control	2	3	1
		Conch Shallow	O44	control	2011-08-03	0	Unsuccessful control							LitConch	M269-ct	Control	2	3	1
		French A	O31	control	2011-09-01	1	Successful control - rapid							LitConch	P080-ct	Control	2	3	1
		French A	Y33	control (2)	2011-09-01	1	Succssful control - PTL, rapid							LitConch	P082-ctB	Control	5	6	0
						12	70.5882							LitConch	P082-ctO	Control	5	6
														LitConch	P082-ctP	Control	5	6
		Aquarius	K27	epoxy band	2011-05-18	0	Successful epoxy band							LitConch	P087-ct	Control	2	3	1
		Aquarius	K29	epoxy band	2011-05-18	1	Partially successful epoxy band							LitConch	P093-ctB	Control	3	4	1
		Aquarius	Y17	epoxy band	2011-06-22	0	Successful epoxy band							LitConch	P096-ctO	Control	5	6	1
		Aquarius	B5	epoxy band	2011-06-22	SNAILS								LitConch	P098-ctP	Control	5	6	1
		Aquarius	Y69	epoxy band	2011-06-22	0	Successful epoxy band							ML	W165-ct	Control	2	3	1
		Aquarius	Y54	epoxy band	2011-06-22	0	Successful epoxy band
		Aquarius	K34	epoxy band	2011-06-24	0	Successful epoxy band
		French B	K35	epoxy band	2011-05-17	0	Successful epoxy band
		Molasses	K88	epoxy band	2011-07-14	1	Unsuccessful epoxy band							ConchShal	M044-ep	Epoxy	1	2	1
		Molasses	K92	epoxy band	2011-07-14	1	Unsuccessful epoxy band							ConchShal	M044-ep2	Epoxy	2	3	0
		Molasses	K86	epoxy band	2011-07-14	1	Unsuccessful epoxy band							ConchShal	M093-ep	Epoxy	2	3	0
		Molasses	K98	epoxy band	2011-08-03	1	Unsuccessful epoxy band							ConchShal	O171-ep	Epoxy	2	3	0
		Conch Shallow	O44	epoxy band	2011-08-03	0	Successful epoxy band							FR	K157-ep	Epoxy	2	3	0
		Pickles	139	epoxy band	2011-09-02	1	Unsuccessful epoxy band							FR	K161-ep	Epoxy	2	3	0
		Molasses	K94	epoxy band (2)	2011-07-14	1	Unsuccessful epoxy band							FR	K161-ep2	Epoxy	3	4	1
		Molasses	190	epoxy band (2)	2011-08-03	1	Unsuccessful epoxy band							FR	M229-ep	Epoxy	5	6	1
		French A	Y33	epoxy band (2)	2011-09-01	1	Unsuccessful epoxy band							FR	M229-ep2	Epoxy	5	6	0
		Molasses	G9	epoxy band (3)	2011-07-14	1	Unsuccessful epoxy band							KLDR	O147-ep	Epoxy	2	3	1
		French A	O31	epoxy band (3)	2011-09-01	1	Unsuccessful epoxy band							KLDR	O158-ep	Epoxy	3	4	0
		Molasses	K95	epoxy band (6)	2011-07-14	1	Some 0, some 1							KLDR	O159-ep	Epoxy	3	4	1
		Molasses	K131	epoxy band (7)	2011-07-14	1	Some 0, some 1							LitConch	M268-ep	Epoxy	2	3	0
						13	65							LitConch	M269-ep	Epoxy	2	3	1
														LitConch	P080-ep	Epoxy	2	3	1
		Aquarius	K30	excision	2011-06-22	0	Successful excision							LitConch	P082-ep	Epoxy	5	6	1
		Aquarius	K32	excision	2011-06-22	0	Successful excision							LitConch	P082-ep2	Epoxy	5	6	0
		Aquarius	K33	excision	2011-06-24	0	Successful excision							LitConch	P082-ep3	Epoxy	5	6	0
		French B	K36	excision	2011-05-17	0	Successful excision							LitConch	P087-ep	Epoxy	2	3	1
		Molasses	K89	excision	2011-07-14	1	Unsuccessful excision							LitConch	P087-ep2	Epoxy	2	3
		Molasses	K131	excision	2011-07-14	BROKEN OFF								LitConch	P096-ep	Epoxy	5	6	0
		Molasses	K90	excision	2011-07-14	1	Unsuccessful excision							LitConch	P098-ep	Epoxy	5	6	0
		Molasses	K91	excision	2011-07-14	1	Unsuccessful excision							ML	W165-ep	Epoxy	2	3	1
		Molasses	K96	excision	2011-07-14	1	Unsuccessful excision
		Molasses	K97	excision	2011-07-14	1	Unsuccessful excision
		Molasses	K99	excision	2011-08-03	1	Unsuccessful excision
		Conch Shallow	O41	excision	2011-08-03	0	Successful excision							ConchShal	M329-ex	Excision	1	2	0
		French A	K137	excision	2011-09-01	1	Unsuccessful excision							ConchShal	M044-ex	Excision	2	3	0
		French A	K138	excision	2011-09-01	1	Unsuccessful excision							ConchShal	M044-ex2	Excision	2	3	0
		French A	K139	excision	2011-09-01	1	Unsuccessful excision							ConchShal	M044-ex3	Excision	2	3	0
		Pickles	140	excision (2)	2011-09-02	1	Unsuccessful excision							ConchShal	M093-ex	Excision	2	3	0
						10	66.6667							FR	M229-ex	Excision	5	6	1
														KLDR	O148-ex	Excision	3	4	0
														KLDR	O148-ex2	Excision	3	4	0
														KLDR	O158-ex	Excision	3	4	1
														KLDR	O158-ex2	Excision	3	4	1
														LitConch	P080-ex	Excision	2	3	1
														LitConch	M269-ex	Excision	2	3	1
